# Supplementary material
Source: PubMed Central journal article supplement (PMC4125410)
Supplement: 6f65b5a00eeff330d18236ee10c39988_genetics.114.163287-7.pdf [file 6f65b5a00eeff330d18236ee10c39988_genetics.114.163287-7.pdf]

**Table S2 Divergent resolutions of intermediate WGD duplicates between *aurelia* species.**

| Intermediate Duplicate 1 descendant(s)                                        |                   | Intermediate Duplicate 2 descendants (s) |              | Function (if known)                                                             |
|-------------------------------------------------------------------------------|-------------------|------------------------------------------|--------------|---------------------------------------------------------------------------------|
| <b>Divergent resolutions between <i>tetraurelia</i> and <i>sexaurella</i></b> |                   |                                          |              |                                                                                 |
| GSPATP00020634001                                                             | GSPATP00027241001 | PSEXGNP07757                             | PSEXGNP11110 | Serine/threonine protein kinase NEK<br>KH domain containing RNA binding protein |
| GSPATP00001449001                                                             | GSPATP00002598001 | PSEXGNP12568                             | --           |                                                                                 |
| <b>Divergent resolutions between <i>biaurelia</i> and <i>sexaurella</i></b>   |                   |                                          |              |                                                                                 |
| PBIGNP32737                                                                   | PBIGNP21940       | PSEXGNP01107                             | PSEXGNP03977 | Serine/threonine protein kinase-related                                         |
| PBIGNP15479                                                                   | PBIGNP27623       | PSEXGNP17612                             | --           | Ribosomal protein L15                                                           |
| PBIGNP00423                                                                   | PBIGNP01848       | PSEXGNP12568                             | --           | KH domain containing RNA binding protein                                        |
| PBIGNP00575                                                                   | --                | PSEXGNP18664                             | --           |                                                                                 |
| <b>Divergent resolutions between <i>biaurelia</i> and <i>tetraurelia</i></b>  |                   |                                          |              |                                                                                 |
| PBIGNP34817                                                                   | --                | GSPATP00027407001                        | --           |                                                                                 |
| PBIGNP00237                                                                   | --                | GSPATP00004767001                        | --           | Cabriolet-related                                                               |
