# Supplementary material
Source: PubMed Central journal article supplement (PMC4125410)
Supplement: 33e0a12b91cd9d497d95fee2093d776c_genetics.114.163287-11.pdf [file 33e0a12b91cd9d497d95fee2093d776c_genetics.114.163287-11.pdf]

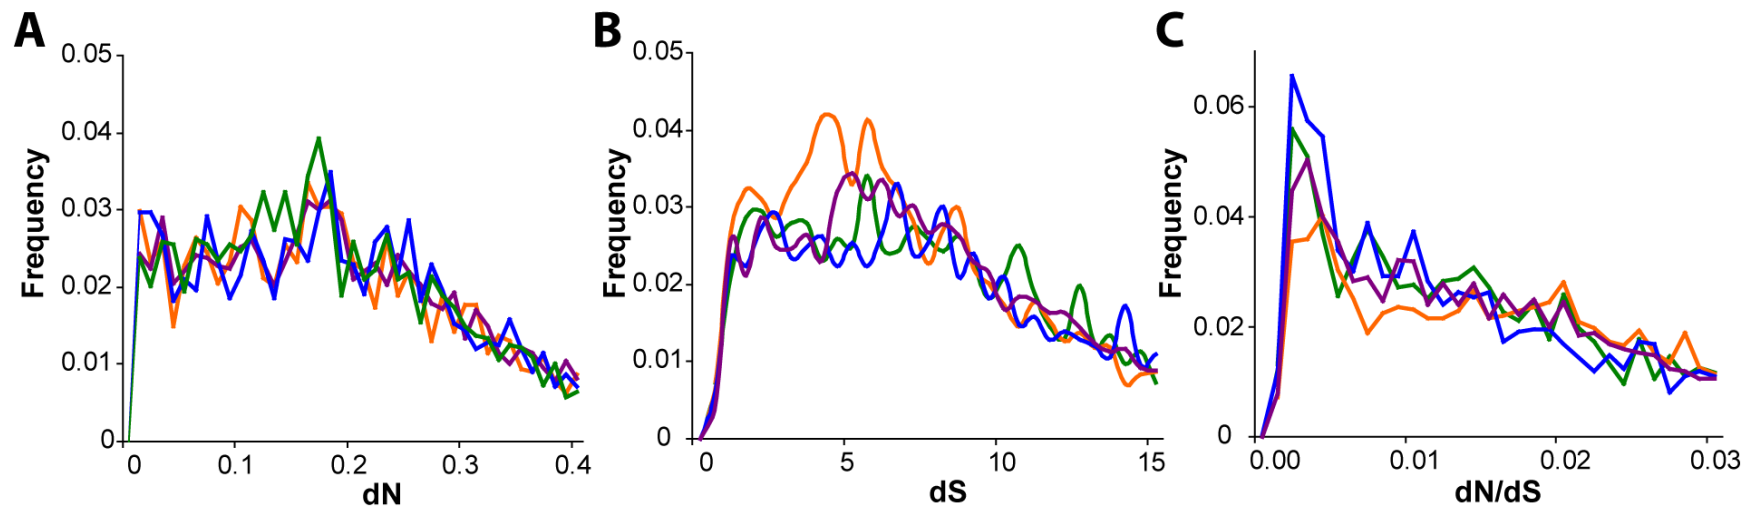

**Figure S1** Distributions of dN (A), dS (B), and dN/dS (C) among intermediate WGD duplicates. Green = intermediate WGD duplicates within *biaurelia*, orange = intermediate WGD duplicates within *tetraurelia*, blue = intermediate WGD duplicates within *sexaurelia*, purple = intermediate WGD duplicates between *tetraurelia* and *sexaurelia*.

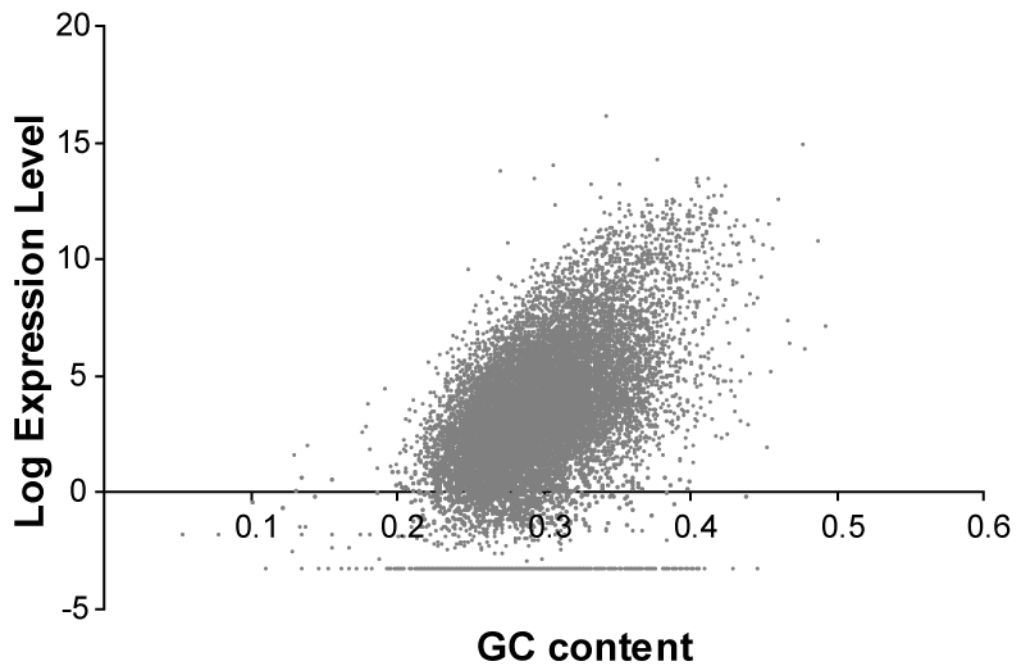

**Figure S2** Relationship between log expression level and GC content of *caudatum* genes.  $R^2=0.23$

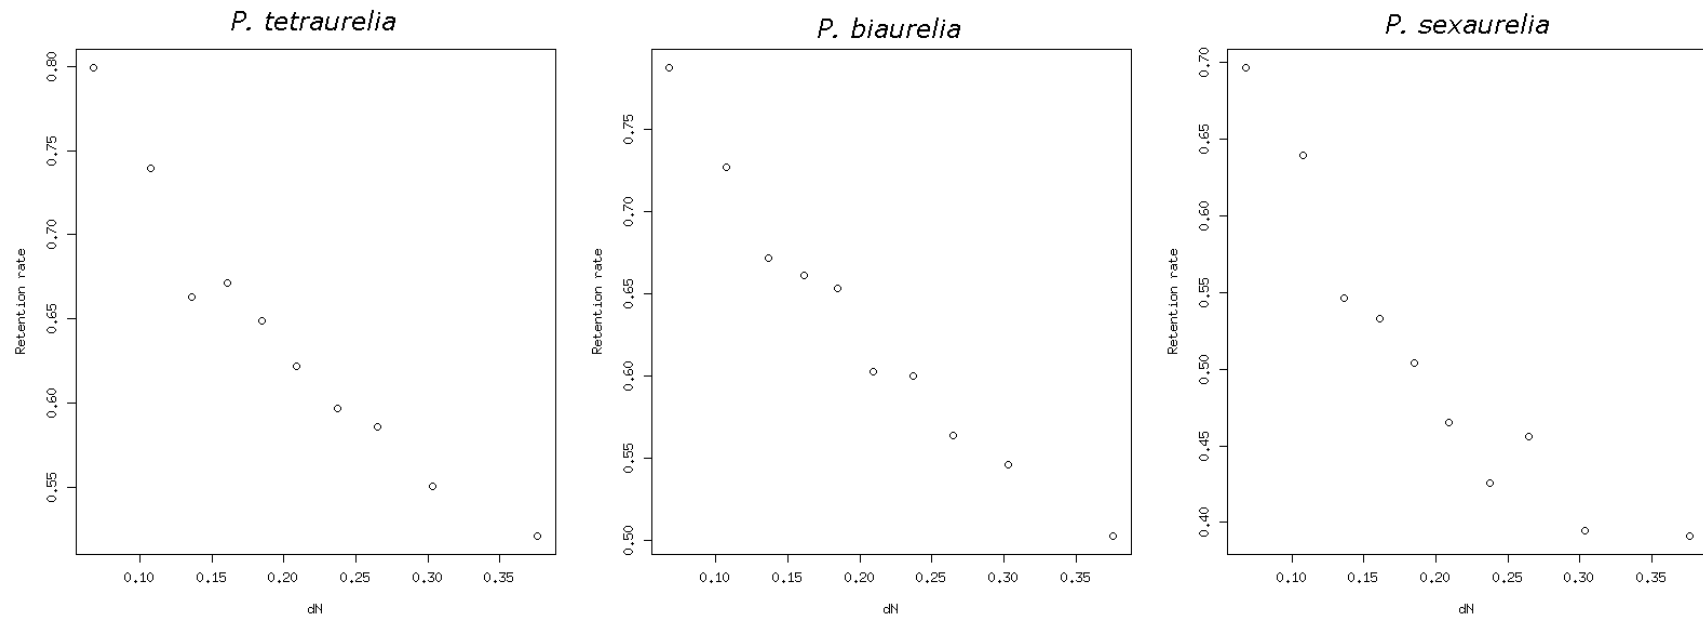

**Figure S3** Relationship between evolutionary rate (dN computed between *P. caudatum* / *P. multimicronucleatum* orthologs) and post-recent-WGD retention rate in three *P. aurelia* species.

### Files S1-S6

Available for download at <http://www.genetics.org/lookup/suppl/doi:10.1534/genetics.114.163287/-/DC1>

**File S1** Excel file containing orthologous blocks between *caudatum* genes and recreated pre-recent WGD *aurelia* segments. Cells where one gene has been lost from a scaffold contain a dot (".").

**File S2** Excel file containing orthologous blocks between *caudatum* genes and recreated pre-intermediate WGD *aurelia* segments. Cells where one gene has been lost from a scaffold contain a dot (".").

**File S3** Excel file containing number of intermediate WGD duplicates vs. single-copy genes in each GO term functional category and *P*-values.

**File S4** Excel file containing candidates for neofunctionalization from *biaurelia*, *tetraurelia*, and *sexaurelia*.

**File S5** Excel file containing paralogous blocks within *caudatum* from the ancient WGD.

**File S6** Excel file containing number of ancient WGD duplicates vs. single-copy genes in each GO term functional category and *P*-values.

**Table S1 Genome assembly and annotation statistics for *P. caudatum*, as compared to *biaurelia* (McGrath *et al.*, submitted), *tetraurelia* (Aury *et al.* 2006) and *sexaurella* (McGrath *et al.*, submitted).**

|                                           | <i>caudatum</i> | <i>biaurelia</i> | <i>tetraurelia</i> | <i>sexaurella</i> |
|-------------------------------------------|-----------------|------------------|--------------------|-------------------|
| Average coverage                          | 186X            | 45X              | 13X                | 42X               |
| Number of scaffolds (total)               | 1,202           | 2,362            | N/A*               | 547               |
| Number of scaffolds (> 2 kb)              | 274             | 1,426            | 697                | 230               |
| Average scaffold length (>2 kb scaffolds) | 109,242         | 53,140           | 103,448            | 294,183           |
| Largest scaffold length                   | 793,585         | 1,048,449        | 980,760            | 1,303,432         |
| Number of gaps                            | 1,412           | 1,459            | 419                | 1,298             |
| Assembly length with gaps (all scaffolds) | 30,525,943      | 76,976,592       | 72,102,941         | 68,020,722        |
| Number of genes                           | 18,509          | 39,242           | 39,521             | 34,939            |

\* Only scaffolds > 2 kb are included in *tetraurelia* assembly

**Table S2 Divergent resolutions of intermediate WGD duplicates between *aurelia* species.**

| Intermediate Duplicate 1 descendant(s)                                        |                   | Intermediate Duplicate 2 descendants (s) |              | Function (if known)                                                          |
|-------------------------------------------------------------------------------|-------------------|------------------------------------------|--------------|------------------------------------------------------------------------------|
| <b>Divergent resolutions between <i>tetraurelia</i> and <i>sexaurelia</i></b> |                   |                                          |              |                                                                              |
| GSPATP00020634001                                                             | GSPATP00027241001 | PSEXGNP07757                             | PSEXGNP11110 | Serine/threonine protein kinase NEK KH domain containing RNA binding protein |
| GSPATP00001449001                                                             | GSPATP00002598001 | PSEXGNP12568                             | --           |                                                                              |
| <b>Divergent resolutions between <i>biaurelia</i> and <i>sexaurelia</i></b>   |                   |                                          |              |                                                                              |
| PBIGNP32737                                                                   | PBIGNP21940       | PSEXGNP01107                             | PSEXGNP03977 | Serine/threonine protein kinase-related                                      |
| PBIGNP15479                                                                   | PBIGNP27623       | PSEXGNP17612                             | --           | Ribosomal protein L15                                                        |
| PBIGNP00423                                                                   | PBIGNP01848       | PSEXGNP12568                             | --           | KH domain containing RNA binding protein                                     |
| PBIGNP00575                                                                   | --                | PSEXGNP18664                             | --           |                                                                              |
| <b>Divergent resolutions between <i>biaurelia</i> and <i>tetraurelia</i></b>  |                   |                                          |              |                                                                              |
| PBIGNP34817                                                                   | --                | GSPATP00027407001                        | --           | Cabriolet-related                                                            |
| PBIGNP00237                                                                   | --                | GSPATP00004767001                        | --           |                                                                              |

**Table S3** Average GC content and log expression level for duplicated vs. single-copy *caudatum* genes from the ancient WGD.

|                      | Duplicated | Single-copy | <i>P</i> -value |
|----------------------|------------|-------------|-----------------|
| GC content           | 0.306      | 0.296       | $<10^{-6}$      |
| Log expression level | 4.33       | 3.50        | $<10^{-8}$      |
