# Supplementary material
Source: PubMed Central journal article supplement (PMC4125410)
Supplement: 905d3e109ed158b20fab1d92dd42fe1c_genetics.114.163287-1.pdf [file 905d3e109ed158b20fab1d92dd42fe1c_genetics.114.163287-1.pdf]

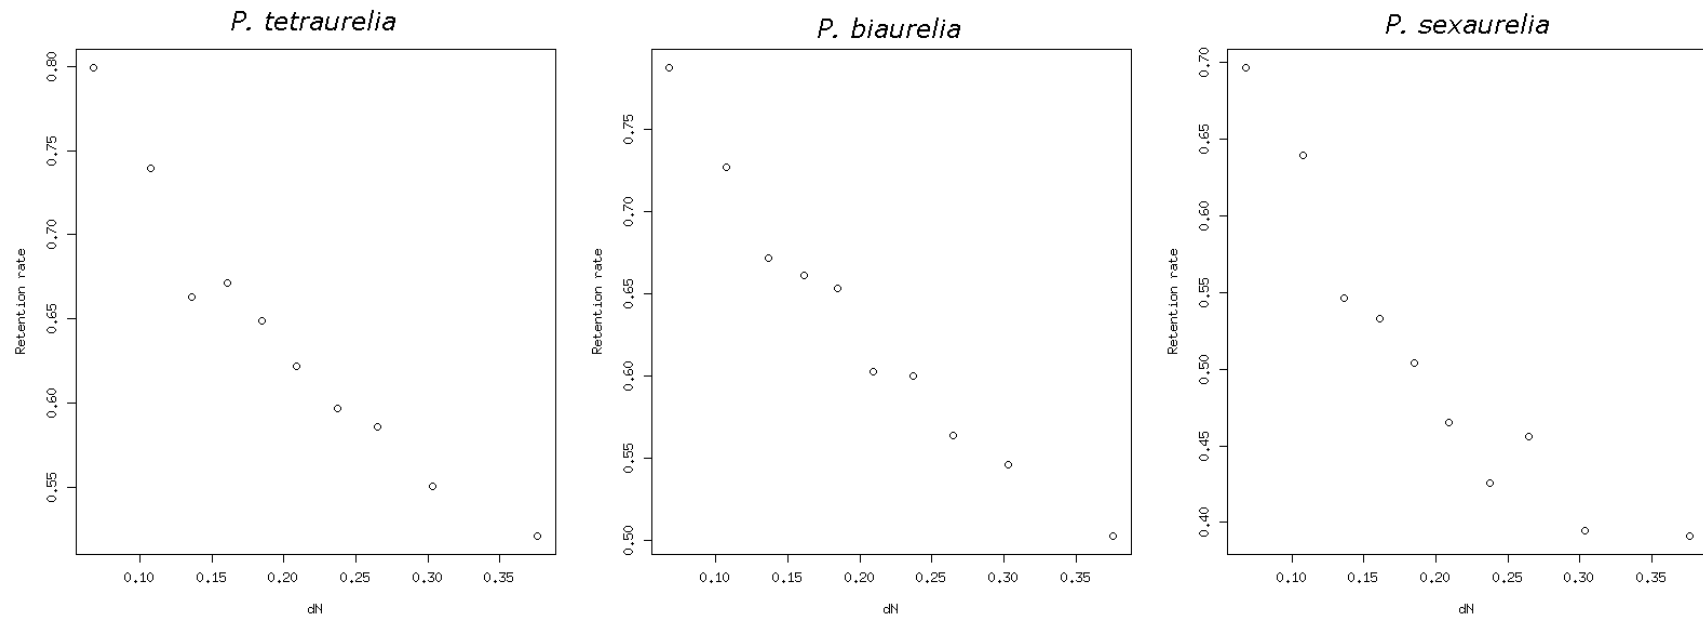

**Figure S3** Relationship between evolutionary rate (dN computed between *P. caudatum* / *P. multimicronucleatum* orthologs) and post-recent-WGD retention rate in three *P. aurelia* species.
