# Supplementary material
Source: PubMed Central journal article supplement (PMC4125410)
Supplement: 2756005190dc8836e2cf4a7bdeab2f56_genetics.114.163287-13.pdf [file 2756005190dc8836e2cf4a7bdeab2f56_genetics.114.163287-13.pdf]

**Table S3 Average GC content and log expression level for duplicated vs. single-copy *caudatum* genes from the ancient WGD.**

|                      | Duplicated | Single-copy | <i>P</i> -value |
|----------------------|------------|-------------|-----------------|
| GC content           | 0.306      | 0.296       | $<10^{-6}$      |
| Log expression level | 4.33       | 3.50        | $<10^{-8}$      |
