# Supplementary material
Source: PubMed Central journal article supplement (PMC4125410)
Supplement: b2e08f157a7baafd992f7a30f9f34da9_genetics.114.163287-4.pdf [file b2e08f157a7baafd992f7a30f9f34da9_genetics.114.163287-4.pdf]

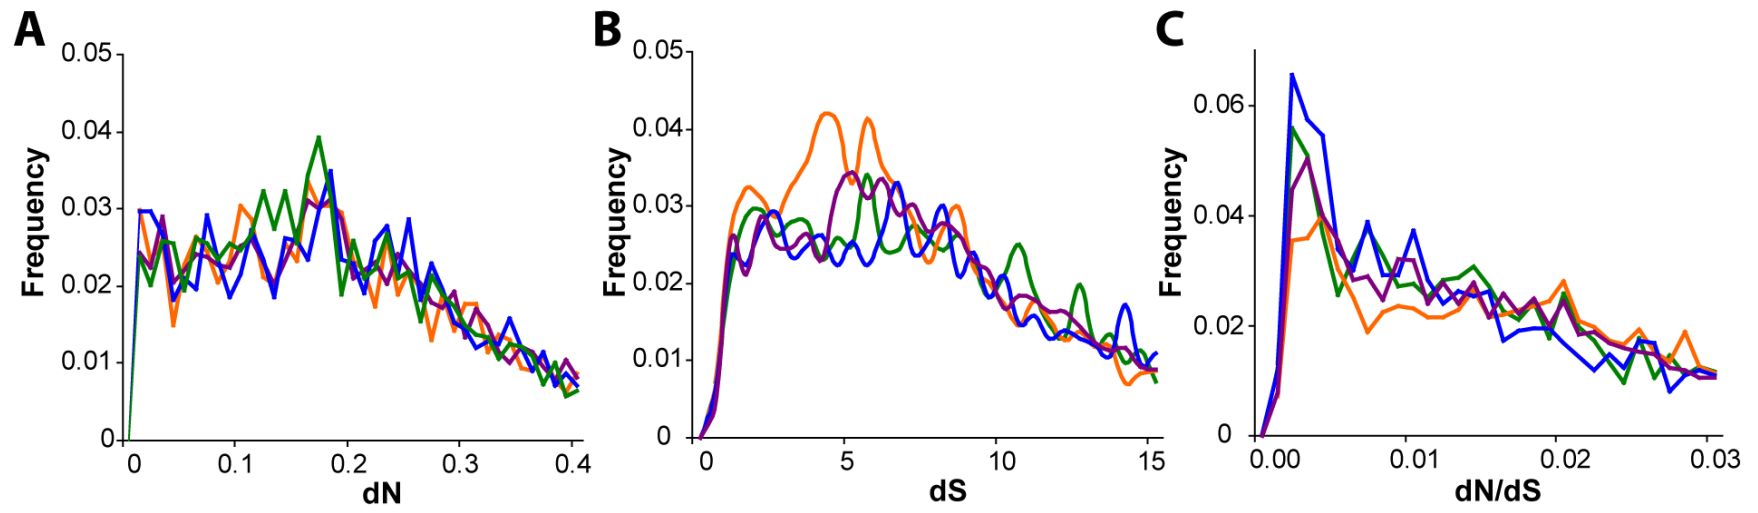

**Figure S1** Distributions of dN (A), dS (B), and dN/dS (C) among intermediate WGD duplicates. Green = intermediate WGD duplicates within *biaurelia*, orange = intermediate WGD duplicates within *tetraurelia*, blue = intermediate WGD duplicates within *sexaurella*, purple = intermediate WGD duplicates between *tetraurelia* and *sexaurella*.
