# Supplementary material
Source: PubMed Central journal article supplement (PMC4125410)
Supplement: faa7232cae9f2c5594c12a61f29c91ed_genetics.114.163287-3.pdf [file faa7232cae9f2c5594c12a61f29c91ed_genetics.114.163287-3.pdf]

**Table S1 Genome assembly and annotation statistics for *P. caudatum*, as compared to *biaurelia* (McGrath *et al.*, submitted), *tetraurelia* (AURY *et al.* 2006) and *sexaurella* (McGrath *et al.*, submitted).**

|                                           | <i>caudatum</i> | <i>biaurelia</i> | <i>tetraurelia</i> | <i>sexaurella</i> |
|-------------------------------------------|-----------------|------------------|--------------------|-------------------|
| Average coverage                          | 186X            | 45X              | 13X                | 42X               |
| Number of scaffolds (total)               | 1,202           | 2,362            | N/A*               | 547               |
| Number of scaffolds (> 2 kb)              | 274             | 1,426            | 697                | 230               |
| Average scaffold length (>2 kb scaffolds) | 109,242         | 53,140           | 103,448            | 294,183           |
| Largest scaffold length                   | 793,585         | 1,048,449        | 980,760            | 1,303,432         |
| Number of gaps                            | 1,412           | 1,459            | 419                | 1,298             |
| Assembly length with gaps (all scaffolds) | 30,525,943      | 76,976,592       | 72,102,941         | 68,020,722        |
| Number of genes                           | 18,509          | 39,242           | 39,521             | 34,939            |

\* Only scaffolds > 2 kb are included in *tetraurelia* assembly
