# Supplementary material
Source: PubMed Central journal article supplement (PMC4125410)

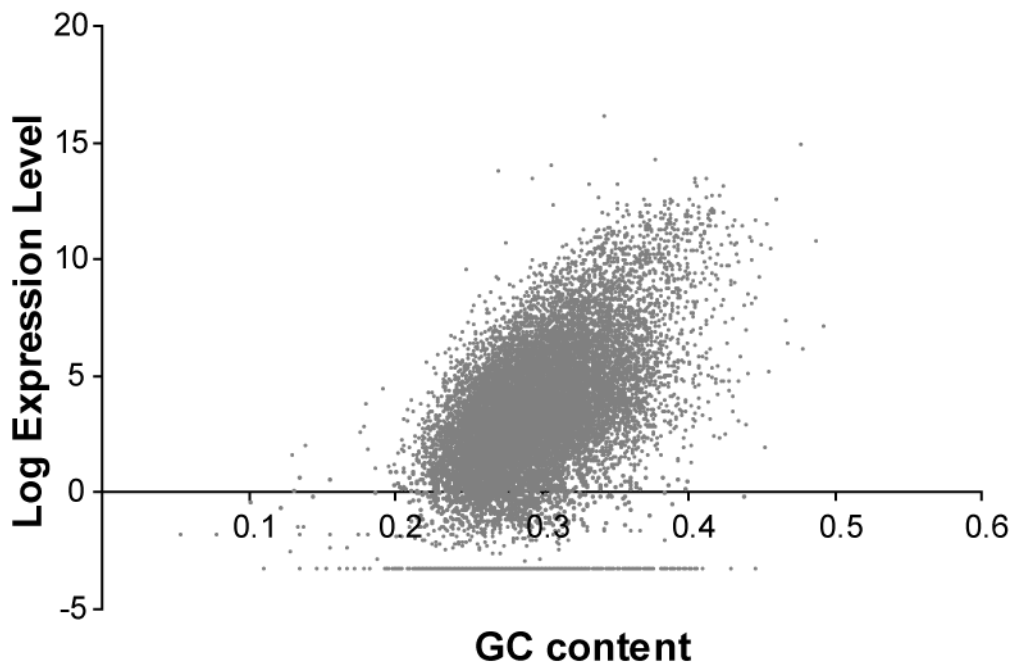

**Figure S2** Relationship between log expression level and GC content of *caudatum* genes.  $R^2=0.23$

Supplement: 5d9a5292f5b427a6c41c811c34e83cf8_genetics.114.163287-8.pdf [file 5d9a5292f5b427a6c41c811c34e83cf8_genetics.114.163287-8.pdf]
